# Supplementary material for: TLR4 polymorphisms may increase susceptibility to periodontitis in Pg-positive individuals
Source: PeerJ. 2019 Nov 21;7:e7828. doi: 10.7717/peerj.7828 (PMC6875378; doi:10.7717/peerj.7828)
Supplement: Supplemental Information 1 [file peerj-07-7828-s001.xlsx]

## Sheet: TLR4 Data
number	Group	diabetes	Pg	Tf	Td	Cr	Pn	kind_a	kind_b	IFG_IGT	diabete_category	diabetes_three_category	n33	missing_teeth	sites	wuyahe	PLI_average	PD_average	BI_average	AL_average	AL3_sites	PLI_category	PD_category	BI_category	AL_category	missing_category	BMI_category	yaotunbi_category	age_category	AL3_percentage	AL3_category	CDC_caegory	VAR00002	twodegree_AL3	twodegree_CDC	AL4_sites	AL5_sites	AL5_percent	AL6_sites	PD4_sites	PD4_percentage	PD5_sites	PD5_percent	PD5_category	PD6_sites	PD6_percent	BOP_sites	BOP_percentage	BOP_category
21	3	0	1	1	0	1	0	2	3	0	0	0	#NULL!	2	208	0	1.23077	3.48077	1.78846	2.13462	20	1	5	2	3	2	1	1	3	38.4615	2	2	0	1	1	12	5	2.40385	1	23	44.2308	12	5.76923	3	2	0.961538	26	50	2
38	1	1	1	0	1	0	1	2	3	#NULL!	2	1	1	6	176	0	2.02273	2.77273	2.27273	4.20455	34	4	3	4	4	3	1	1	3	77.2727	3	3	1	1	1	23	19	10.7955	13	14	31.8182	6	3.40909	2	1	0.568182	28	63.6364	2
48	3	0	1	1	1	1	0	3	4	0	0	0	#NULL!	2	208	0	1.42308	2.55769	2.21154	0.596154	4	2	3	4	1	2	4	1	1	7.69231	1	2	0	0	1	3	0	0	0	7	13.4615	1	0.480769	1	0	0	30	57.6923	2
73	1	1	0	1	1	1	1	2	4	#NULL!	4	2	2	3	200	0	1.46	1.98	1.68	0.98	9	2	1	2	1	3	5	4	1	18	1	2	0	0	1	3	0	0	0	1	2	0	0	1	0	0	24	48	1
77	3	0	1	1	1	1	1	3	5	0	0	0	#NULL!	7	168	0	1.61905	2.30952	1.57143	1.61905	14	2	2	1	2	4	1	1	3	33.3333	1	2	0	0	1	7	2	1.19048	1	4	9.52381	0	0	1	0	0	16	38.0952	1
81	2	0	1	1	0	1	0	2	3	1	1	1	#NULL!	1	216	0	2.05556	2.85185	2.16667	2.57407	25	4	4	3	3	2	1	1	4	46.2963	2	2	0	1	1	18	8	3.7037	0	16	29.6296	2	0.925926	1	0	0	36	66.6667	2
103	1	1	0	0	0	0	0	0	0	#NULL!	4	2	4	2	208	0	1.13462	2.13462	1.86538	2.84615	36	1	1	2	3	2	1	3	3	69.2308	3	2	0	1	1	13	3	1.44231	0	1	1.92308	0	0	1	0	0	28	53.8462	2
109	1	1	1	1	1	0	1	3	4	#NULL!	2	1	3	3	200	0	2.82	3.7	2.08	3.82	34	5	5	3	4	3	1	2	2	68	3	3	1	1	1	26	18	9	5	20	40	9	4.5	3	3	1.5	29	58	2
131	3	0	1	1	1	1	0	3	4	0	0	0	#NULL!	0	224	0	0.982143	1.625	1.08929	0.107143	0	1	1	1	1	1	3	1	2	0	1	1	0	0	0	0	0	0	0	0	0	0	0	1	0	0	5	8.92857	0
140	3	0	1	1	0	0	0	2	2	0	0	0	#NULL!	0	224	0	1.57143	3.08929	2.39286	3.82143	41	2	4	4	4	1	4	1	3	73.2143	3	3	1	1	1	32	22	9.82143	9	17	30.3571	4	1.78571	2	2	0.892857	40	71.4286	2
141	3	0	1	1	1	1	0	3	4	0	0	0	#NULL!	4	192	0	1.375	4.29167	2.375	4.6875	38	2	5	4	5	3	2	1	2	79.1667	3	3	1	1	1	33	28	14.5833	22	27	56.25	20	10.4167	4	12	6.25	32	66.6667	2
154	1	1	1	1	1	1	1	3	5	#NULL!	2	1	3	0	224	0	1.41071	3.28571	2.14286	2.42857	26	2	4	3	3	1	4	2	1	46.4286	2	2	0	1	1	17	9	4.01786	1	20	35.7143	11	4.91071	3	2	0.892857	31	55.3571	2
157	3	0	0	1	0	0	0	1	1	0	0	0	#NULL!	14	112	0	1.71429	1.96429	1.92857	3.28571	22	3	1	2	4	4	1	1	4	78.5714	3	2	0	1	1	16	7	6.25	2	0	0	0	0	1	0	0	15	53.5714	2
164	1	1	1	1	1	1	1	3	5	#NULL!	2	1	3	2	208	0	1.36538	2.23077	1.92308	0.115385	1	2	2	2	1	2	3	3	1	1.92308	1	1	0	0	0	0	0	0	0	3	5.76923	0	0	1	0	0	24	46.1538	1
171	1	1	0	1	0	1	0	1	2	#NULL!	2	1	4	13	120	0	2.2	3.36667	2.36667	6.2	30	4	4	4	5	4	4	4	3	100	3	3	1	1	1	29	29	24.1667	19	11	36.6667	6	5	3	2	1.66667	21	70	2
177	3	0	0	1	0	0	0	1	1	1	1	1	#NULL!	3	200	0	1.7	2.34	1.66	0.96	10	3	2	2	1	3	4	4	3	20	1	1	0	0	0	1	0	0	0	2	4	0	0	1	0	0	19	38	1
195	2	0	1	1	1	0	1	3	4	0	0	0	#NULL!	1	216	0	1.62963	2.83333	1.44444	2.07407	25	2	4	1	2	2	5	4	2	46.2963	2	2	0	1	1	10	2	0.925926	0	12	22.2222	2	0.925926	1	0	0	12	22.2222	0
196	2	0	1	1	1	1	1	3	5	1	1	1	#NULL!	0	224	0	1.85714	3.25	2.53571	3.125	36	3	4	4	4	1	4	3	3	64.2857	2	3	1	1	1	25	15	6.69643	2	17	30.3571	7	3.125	2	1	0.446429	41	73.2143	2
200	2	0	1	1	1	1	0	3	4	0	0	0	#NULL!	0	224	0	1.33929	2.14286	1.82143	0.571429	2	1	1	2	1	1	4	3	1	3.57143	1	1	0	0	0	0	0	0	0	6	10.7143	1	0.446429	1	0	0	28	50	2
215	2	0	1	1	1	1	1	3	5	0	0	0	#NULL!	3	200	0	1.2	2.36	1.94	0.38	2	1	2	3	1	3	1	1	1	4	1	1	0	0	0	0	0	0	0	5	10	0	0	1	0	0	22	44	1
217	2	0	1	1	1	1	1	3	5	0	0	0	#NULL!	2	208	0	2.21154	4.40385	3.67308	3.78846	41	4	5	5	4	2	1	2	1	78.8462	3	3	1	1	1	29	19	9.13462	6	33	63.4615	26	12.5	4	13	6.25	51	98.0769	3
228	2	0	0	0	0	0	0	0	0	0	0	0	#NULL!	5	184	0	1.91304	3.73913	2.97826	4.36957	39	3	5	5	5	3	4	4	2	84.7826	3	3	1	1	1	28	20	10.8696	11	24	52.1739	17	9.23913	3	1	0.543478	39	84.7826	3
238	2	0	1	1	1	1	0	3	4	0	0	0	#NULL!	3	200	0	1.48	3.42	2.24	3.2	30	2	5	4	4	3	1	4	2	60	2	3	1	1	1	21	13	6.5	6	17	34	12	6	3	6	3	29	58	2
239	3	0	1	1	1	1	0	3	4	0	0	0	#NULL!	5	184	0	1.63043	2.91304	2.30435	2.5	21	2	4	4	3	3	3	1	2	45.6522	2	3	1	1	1	16	8	4.34783	7	10	21.7391	4	2.17391	2	1	0.543478	30	65.2174	2
242	3	0	1	1	0	0	0	2	2	0	0	0	#NULL!	3	200	0	0.84	2.08	2.32	1.94	18	1	1	4	2	3	3	2	4	36	2	2	0	1	1	10	6	3	1	4	8	1	0.5	1	0	0	32	64	2
274	2	0	1	1	1	1	0	3	4	1	1	1	#NULL!	1	216	0	0.703704	2.12963	1.24074	0.277778	1	1	1	1	1	2	1	2	2	1.85185	1	2	0	0	1	0	0	0	0	5	9.25926	3	1.38889	2	0	0	19	35.1852	1
286	1	1	1	1	0	1	0	2	3	#NULL!	4	2	4	8	160	0	1.975	3.6	2.875	3.525	19	4	5	5	4	4	3	3	2	47.5	2	3	1	1	1	18	17	10.625	13	17	42.5	12	7.5	3	5	3.125	34	85	3
289	2	0	1	1	1	1	1	3	5	0	0	0	#NULL!	0	224	0	2.05357	2.44643	2.66071	0.892857	7	4	2	5	1	1	3	2	1	12.5	1	2	0	0	1	5	1	0.446429	0	3	5.35714	0	0	1	0	0	45	80.3571	3
293	1	1	1	1	1	1	1	3	5	#NULL!	4	2	2	4	192	0	1.70833	3.72917	2.97917	3.79167	29	3	5	5	4	3	4	2	2	60.4167	2	3	1	1	1	24	22	11.4583	9	27	56.25	9	4.6875	3	1	0.520833	44	91.6667	3
300	1	1	0	0	0	0	0	0	0	#NULL!	4	2	3	3	200	0	2.26	2.8	1.62	2.66	30	4	3	2	3	3	4	2	3	60	2	3	1	1	1	19	10	5	5	9	18	3	1.5	2	1	0.5	18	36	1
301	3	0	1	1	1	1	0	3	4	0	0	0	#NULL!	9	146	0	1.21053	2.44444	1.86111	2.80556	17	1	2	2	3	4	1	3	4	47.2222	2	3	1	1	1	15	12	8.21918	6	5	13.8889	1	0.684932	1	0	0	17	47.2222	1
304	1	1	1	1	1	0	1	3	4	#NULL!	2	1	1	12	128	0	1.1875	2.8125	1.65625	4.625	26	1	3	2	5	4	1	1	3	81.25	3	3	1	1	1	18	14	10.9375	9	8	25	5	3.90625	2	2	1.5625	12	37.5	1
317	1	1	1	1	1	1	0	3	4	#NULL!	4	2	4	0	224	0	1.35714	2.92857	1.91071	1.53571	13	2	4	2	2	1	4	4	3	23.2143	1	2	0	0	1	5	3	1.33929	0	14	25	10	4.46429	3	5	2.23214	30	53.5714	2
332	2	0	0	0	0	0	1	0	1	0	0	0	#NULL!	2	208	0	2.13462	2.53846	1.59615	2.76923	29	4	3	2	3	2	4	1	2	55.7692	2	3	1	1	1	15	10	4.80769	2	3	5.76923	1	0.480769	1	1	0.480769	19	36.5385	1
350	3	0	0	1	0	0	0	1	1	0	0	0	#NULL!	9	152	0	2.63158	3.26316	2.39474	5.97368	33	5	4	4	5	4	1	1	3	86.8421	3	3	1	1	1	29	24	15.7895	20	11	28.9474	5	3.28947	2	3	1.97368	25	65.7895	2
362	2	0	0	1	1	0	1	2	3	1	1	1	#NULL!	1	216	0	1.74074	2.07407	2.2963	2.14815	25	3	1	4	3	2	4	3	4	46.2963	2	3	1	1	1	9	6	2.77778	2	4	7.40741	2	0.925926	1	0	0	39	72.2222	2
383	2	0	1	1	1	1	0	3	4	1	1	1	#NULL!	2	208	0	1.55769	2.09615	1.73077	2.75	36	2	1	2	3	2	4	1	2	69.2308	3	2	0	1	1	19	10	4.80769	2	0	0	0	0	1	0	0	23	44.2308	1
388	3	0	0	1	0	0	0	1	1	0	0	0	#NULL!	3	200	0	1.16	1.44	1.28	1.76	21	1	1	1	2	3	1	2	4	42	2	2	0	1	1	10	1	0.5	0	0	0	0	0	1	0	0	8	16	0
391	1	1	1	1	1	1	1	3	5	#NULL!	2	1	2	16	96	0	2.58333	4.33333	2.875	7.29167	24	5	5	5	5	5	3	3	3	100	3	3	1	1	1	24	24	25	23	18	75	12	12.5	4	3	3.125	21	87.5	3
398	2	0	1	1	1	1	0	3	4	1	1	1	#NULL!	6	176	0	1.54545	1.61364	1.59091	2.70455	25	2	1	2	3	3	4	2	3	56.8182	2	3	1	1	1	14	6	3.40909	2	1	2.27273	1	0.568182	1	0	0	14	31.8182	1
406	2	0	1	1	1	1	1	3	5	1	1	1	#NULL!	0	224	0	1.94643	2.91071	2.375	0.964286	7	4	4	4	1	1	3	3	3	12.5	1	2	0	0	1	3	0	0	0	13	23.2143	3	1.33929	2	0	0	38	67.8571	2
429	3	0	1	1	1	1	0	3	4	0	0	0	#NULL!	0	224	0	1.375	2.53571	2.23214	0.285714	3	2	3	4	1	1	3	2	2	5.35714	1	2	0	0	1	1	1	0.446429	0	6	10.7143	3	1.33929	2	0	0	33	58.9286	2
434	1	1	1	1	1	1	1	3	5	#NULL!	2	1	4	5	184	0	1.91304	1.71739	1.67391	1.5	14	3	1	2	2	3	5	3	3	30.4348	1	2	0	0	1	2	2	1.08696	0	0	0	0	0	1	0	0	20	43.4783	1
435	3	0	0	0	0	0	1	0	1	0	0	0	#NULL!	1	216	0	1.2963	1.88889	1.2963	0.333333	1	1	1	1	1	2	4	3	2	1.85185	1	1	0	0	0	0	0	0	0	1	1.85185	0	0	1	0	0	12	22.2222	0
449	2	0	1	1	1	1	1	3	5	1	1	1	#NULL!	0	224	0	0.910714	2.60714	2.32143	1.48214	14	1	3	4	2	1	4	2	3	25	1	2	0	0	1	7	2	0.892857	0	7	12.5	2	0.892857	1	0	0	36	64.2857	2
464	1	1	1	1	1	1	1	3	5	#NULL!	2	1	2	0	224	0	1.64286	2.19643	1.41071	1.30357	11	2	2	1	2	1	4	3	2	19.6429	1	2	0	0	1	7	3	1.33929	1	1	1.78571	0	0	1	0	0	14	25	1
475	1	1	1	1	0	1	1	2	4	#NULL!	4	2	1	0	224	0	1.42857	2.39286	1.71429	0.803571	8	2	2	2	1	1	4	4	2	14.2857	1	2	0	0	1	4	1	0.446429	0	3	5.35714	2	0.892857	1	0	0	26	46.4286	1
476	3	0	1	1	0	1	0	2	3	0	0	0	#NULL!	20	64	0	2.3125	2.75	2.5	2.5625	8	5	3	4	3	5	1	2	4	50	2	2	0	1	1	6	6	9.375	1	3	18.75	0	0	1	0	0	12	75	3
483	3	0	1	1	1	1	0	3	4	0	0	0	#NULL!	0	224	0	2	3.875	2.33929	3.08929	38	4	5	4	3	1	1	2	2	67.8571	3	2	0	1	1	22	11	4.91071	0	31	55.3571	16	7.14286	3	6	2.67857	43	76.7857	3
489	2	0	0	1	1	1	1	2	4	0	0	0	#NULL!	2	208	0	1.40385	1.78846	1.40385	0.807692	10	2	1	1	1	2	3	3	3	19.2308	1	1	0	0	0	1	1	0.480769	0	0	0	0	0	1	0	0	12	23.0769	0
534	2	0	1	1	0	0	1	2	3	1	1	1	#NULL!	23	40	0	2	3.2	2.6	2.2	4	4	4	5	3	5	4	3	4	40	2	3	1	1	1	4	3	7.5	2	2	20	2	5	3	0	0	9	90	3
560	2	0	1	1	1	1	0	3	4	0	0	0	#NULL!	0	224	0	2.01786	3.51786	3.625	1.21429	9	4	5	5	1	1	4	3	1	16.0714	1	2	0	0	1	5	1	0.446429	0	21	37.5	8	3.57143	2	3	1.33929	54	96.4286	3
584	3	0	0	1	1	1	1	2	4	0	0	0	#NULL!	0	224	0	2.30357	2.48214	2.21429	1.5	14	5	2	4	2	1	3	2	4	25	1	2	0	0	1	2	0	0	0	5	8.92857	2	0.892857	1	0	0	42	75	3
622	2	0	1	1	1	1	1	3	5	0	0	0	#NULL!	7	161	0	1.7561	2.725	1.675	3.825	29	3	3	2	4	4	5	2	3	72.5	3	3	1	1	1	23	18	11.1801	10	5	12.5	2	1.24224	1	1	0.621118	14	35	1
628	3	0	1	1	1	1	0	3	4	0	0	0	#NULL!	0	224	0	0.625	2.42857	1.64286	1.67857	22	1	2	2	2	1	1	1	3	39.2857	2	2	0	1	1	11	2	0.892857	0	6	10.7143	1	0.446429	1	0	0	23	41.0714	1
630	1	1	0	0	0	0	0	0	0	#NULL!	2	1	2	5	184	0	2.08696	2.80435	2.15217	3.28261	33	4	3	3	4	3	3	4	3	71.7391	3	3	1	1	1	22	12	6.52174	2	4	8.69565	2	1.08696	1	1	0.543478	28	60.8696	2
640	3	0	0	0	0	0	0	0	0	0	0	0	#NULL!	3	200	0	2.14	2.46	2.56	4.3	43	4	2	4	5	3	1	4	4	86	3	3	1	1	1	34	24	12	7	3	6	2	1	1	0	0	40	80	3
644	2	0	1	1	1	1	1	3	5	0	0	0	#NULL!	7	161	0	1.53659	2	1.775	1.85	16	2	1	2	2	4	4	2	4	40	2	2	0	1	1	6	5	3.10559	1	0	0	0	0	1	0	0	16	40	1
652	1	1	1	1	1	1	0	3	4	#NULL!	4	2	3	2	208	0	2.28846	2.96154	2.63462	1.80769	16	5	4	5	2	2	4	3	2	30.7692	1	2	0	0	1	10	4	1.92308	0	12	23.0769	4	1.92308	2	1	0.480769	37	71.1538	2
687	2	0	1	1	1	1	1	3	5	0	0	0	#NULL!	3	200	0	2	2.8	2.7	1.88	21	4	3	5	2	3	3	1	2	42	2	2	0	1	1	11	8	4	1	7	14	0	0	1	0	0	37	74	2
706	2	0	1	1	1	1	0	3	4	0	0	0	#NULL!	0	224	0	1.75	2.28571	1.89286	0.625	6	3	2	2	1	1	3	3	3	10.7143	1	1	0	0	0	1	0	0	0	4	7.14286	1	0.446429	1	0	0	25	44.6429	1
713	3	0	1	1	0	1	0	2	3	0	0	0	#NULL!	1	216	0	2	2.68519	1.83333	1.07407	8	4	3	2	1	2	4	1	2	14.8148	1	2	0	0	1	2	1	0.462963	1	11	20.3704	2	0.925926	1	0	0	25	46.2963	1
726	2	0	1	1	0	1	0	2	3	1	1	1	#NULL!	5	184	0	1.80435	2.04348	1.5	1.47826	12	3	1	1	2	3	4	3	3	26.087	1	1	0	0	0	1	1	0.543478	0	2	4.34783	1	0.543478	1	0	0	14	30.4348	1
728	3	0	1	1	0	1	0	2	3	0	0	0	#NULL!	14	112	0	2.14286	3.71429	1.53571	7.17857	26	4	5	1	5	4	1	1	3	92.8571	3	3	1	1	1	24	21	18.75	18	15	53.5714	9	8.03571	3	4	3.57143	7	25	1
753	2	0	1	1	0	1	0	2	3	0	0	0	#NULL!	18	80	0	2.1	2.25	2.25	3.8	17	4	2	4	4	5	3	2	4	85	3	2	0	1	1	9	6	7.5	1	1	5	0	0	1	0	0	14	70	2
760	2	0	1	1	1	1	1	3	5	1	1	1	#NULL!	1	216	0	2.01852	2.44444	2.64815	2.66667	34	4	2	5	3	2	4	2	2	62.963	2	2	0	1	1	12	5	2.31481	2	2	3.7037	0	0	1	0	0	51	94.4444	3
765	1	1	0	0	0	0	0	0	0	#NULL!	3	2	2	5	184	0	1.93478	3.76087	3.19565	4.73913	40	3	5	5	5	3	3	4	3	86.9565	3	3	1	1	1	35	27	14.6739	12	19	41.3043	14	7.6087	3	6	3.26087	40	86.9565	3
772	3	0	1	1	1	1	1	3	5	0	0	0	#NULL!	18	80	0	2.15	3.7	2.65	5.8	18	4	5	5	5	5	3	1	3	90	3	3	1	1	1	18	18	22.5	12	10	50	6	7.5	3	3	3.75	16	80	3
775	3	0	1	1	0	1	0	2	3	0	0	0	#NULL!	2	208	0	1.63462	2.32692	1.75	3.48077	37	2	2	2	4	2	1	2	4	71.1538	3	3	1	1	1	25	18	8.65385	5	9	17.3077	4	1.92308	2	3	1.44231	23	44.2308	1
778	1	1	1	1	1	1	0	3	4	#NULL!	4	2	4	0	224	0	2.35714	2.08929	2.55357	0.589286	9	5	1	4	1	1	3	3	2	16.0714	1	2	0	0	1	5	0	0	0	1	1.78571	0	0	1	0	0	41	73.2143	2
790	3	0	0	1	0	1	0	1	2	0	0	0	#NULL!	2	208	0	2.09615	3.05769	1.71154	1.57692	12	4	4	2	2	2	3	2	2	23.0769	1	2	0	0	1	6	4	1.92308	1	12	23.0769	4	1.92308	2	1	0.480769	23	44.2308	1
798	3	0	1	1	1	1	1	3	5	0	0	0	#NULL!	13	120	0	1.63333	2.83333	3.16667	3.2	19	2	4	5	4	4	1	2	3	63.3333	2	3	1	1	1	9	7	5.83333	5	10	33.3333	3	2.5	2	0	0	27	90	3
808	1	1	1	1	1	1	1	3	5	#NULL!	3	2	2	2	208	0	1.05769	1.5	1.15385	1.46154	11	1	1	1	2	2	5	4	4	21.1538	1	2	0	0	1	2	2	0.961538	0	0	0	0	0	1	0	0	5	9.61538	0
809	3	0	1	1	0	0	0	2	2	0	0	0	#NULL!	2	208	0	1.69231	3.32692	2.46154	1.5	9	3	4	4	2	2	1	2	3	17.3077	1	2	0	0	1	4	1	0.480769	0	17	32.6923	7	3.36538	2	0	0	39	75	3
812	3	0	0	1	1	1	1	2	4	0	0	0	#NULL!	7	168	0	1.07143	2	1.40476	2.71429	27	1	1	1	3	4	4	1	3	64.2857	2	2	0	1	1	18	6	3.57143	1	2	4.7619	0	0	1	0	0	10	23.8095	0
829	3	0	1	1	0	0	0	2	2	0	0	0	#NULL!	3	200	0	1.66	3.52	2.04	3.98	34	3	5	3	4	3	1	1	1	68	3	3	1	1	1	27	22	11	9	23	46	7	3.5	2	1	0.5	33	66	2
835	1	1	1	1	1	1	1	3	5	#NULL!	4	2	4	0	224	0	1.44643	2.03571	1.53571	0.410714	2	2	1	1	1	1	4	3	1	3.57143	1	1	0	0	0	0	0	0	0	0	0	0	0	1	0	0	18	32.1429	1
849	2	0	0	1	1	1	1	2	4	1	1	1	#NULL!	4	192	0	2.10417	2.16667	2.10417	1.97917	20	4	2	3	2	3	1	2	4	41.6667	2	2	0	1	1	12	5	2.60417	1	1	2.08333	1	0.520833	1	0	0	25	52.0833	2
851	1	1	1	1	1	1	0	3	4	#NULL!	2	1	4	5	184	0	2.41304	3.71739	2.71739	6.34783	43	5	5	5	5	3	4	4	2	93.4783	3	3	1	1	1	40	38	20.6522	30	23	50	12	6.52174	3	2	1.08696	34	73.913	2
852	2	0	0	1	1	1	1	2	4	0	0	0	#NULL!	2	208	0	1.73077	2.28846	2.75	1.71154	21	3	2	5	2	2	1	2	2	40.3846	2	2	0	1	1	7	1	0.480769	0	1	1.92308	0	0	1	0	0	40	76.9231	3
858	1	1	1	1	0	1	0	2	3	#NULL!	2	1	1	11	136	0	1.52941	2.47059	1.61765	4.17647	30	2	2	2	4	4	1	1	4	88.2353	3	2	0	1	1	24	16	11.7647	5	1	2.94118	0	0	1	0	0	16	47.0588	1
864	1	1	1	0	1	1	0	2	3	#NULL!	4	2	2	17	88	0	2.90909	3.31818	3.09091	5.45455	22	5	4	5	5	5	3	2	4	100	3	3	1	1	1	20	18	20.4545	10	7	31.8182	4	4.54545	3	1	1.13636	20	90.9091	3
879	1	1	1	1	0	1	0	2	3	#NULL!	4	2	1	0	224	0	2.30357	2.57143	2.26786	3.89286	51	5	3	4	4	1	4	2	3	91.0714	3	3	1	1	1	31	15	6.69643	6	6	10.7143	2	0.892857	1	0	0	36	64.2857	2
919	3	0	1	1	1	0	0	3	3	1	1	1	#NULL!	0	224	0	1.875	3.08929	2.41071	1.80357	14	3	4	4	2	1	1	1	3	25	1	2	0	0	1	10	4	1.78571	0	17	30.3571	5	2.23214	2	0	0	40	71.4286	2
923	1	1	1	1	1	1	1	3	5	#NULL!	3	2	1	2	208	0	2.28846	3	2.40385	2.28846	25	5	4	4	3	2	4	4	3	48.0769	2	2	0	1	1	14	1	0.480769	0	14	26.9231	2	0.961538	1	0	0	37	71.1538	2
930	3	0	0	1	1	1	1	2	4	0	0	0	#NULL!	16	96	0	0.708333	2.125	2.125	1.75	11	1	1	3	2	5	1	2	2	45.8333	2	2	0	1	1	3	0	0	0	4	16.6667	1	1.04167	1	0	0	15	62.5	2
940	2	0	0	1	1	1	0	2	3	0	0	0	#NULL!	1	216	0	1.25926	2.2963	2.07407	0.888889	10	1	2	3	1	2	5	3	2	18.5185	1	1	0	0	0	1	0	0	0	3	5.55556	1	0.462963	1	0	0	32	59.2593	2
954	2	0	0	0	0	0	0	0	0	0	0	0	#NULL!	18	80	0	2.05	3.35	2.15	5.45	20	4	4	3	5	5	3	1	3	100	3	3	1	1	1	19	14	17.5	5	5	25	3	3.75	2	2	2.5	12	60	2
957	2	0	1	1	1	1	1	3	5	1	1	1	#NULL!	0	224	0	1.375	3.05357	3.17857	1.33929	10	2	4	5	2	1	4	3	1	17.8571	1	2	0	0	1	4	3	1.33929	1	15	26.7857	7	3.125	2	2	0.892857	47	83.9286	3
959	2	0	0	0	1	1	0	1	2	0	0	0	#NULL!	0	224	0	0.482143	1.64286	1.01786	0.446429	4	1	1	1	1	1	1	2	1	7.14286	1	1	0	0	0	0	0	0	0	2	3.57143	0	0	1	0	0	12	21.4286	0
968	1	1	0	0	1	0	1	1	2	#NULL!	2	1	3	3	200	0	1.32	1.48	1.1	0.84	9	1	1	1	1	3	4	3	1	18	1	2	0	0	1	2	1	0.5	0	1	2	0	0	1	0	0	3	6	0
981	3	0	1	1	0	0	1	2	3	0	0	0	#NULL!	4	192	0	1.22917	2.4375	2.33333	0.708333	7	1	2	4	1	3	3	2	2	14.5833	1	2	0	0	1	2	0	0	0	3	6.25	1	0.520833	1	0	0	33	68.75	2
983	3	0	1	1	1	0	1	3	4	0	0	0	#NULL!	3	200	0	1.92	3.62	3.1	3.04	25	3	5	5	3	3	1	2	1	50	2	3	1	1	1	21	15	7.5	8	22	44	14	7	3	4	2	44	88	3
997	1	1	1	1	1	1	1	3	5	#NULL!	4	2	1	3	200	0	2.64	3.86	2.86	4.2	39	5	5	5	4	3	1	3	3	78	3	3	1	1	1	33	18	9	10	27	54	16	8	3	9	4.5	41	82	3
1001	2	0	0	1	0	0	1	1	2	0	0	0	#NULL!	4	192	0	1.08333	1.89583	1.33333	1.54167	19	1	1	1	2	3	3	1	3	39.5833	2	2	0	1	1	2	1	0.520833	0	0	0	0	0	1	0	0	11	22.9167	0
1015	3	0	1	1	1	1	1	3	5	0	0	0	#NULL!	2	208	0	1.32692	2.05769	1.86538	0.307692	2	1	1	2	1	2	3	1	2	3.84615	1	1	0	0	0	1	0	0	0	1	1.92308	1	0.480769	1	0	0	26	50	2
1020	3	0	1	1	1	1	0	3	4	0	0	0	#NULL!	0	224	0	1.07143	3.33929	2.32143	1.625	18	1	4	4	2	1	1	2	2	32.1429	1	2	0	0	1	14	5	2.23214	1	17	30.3571	11	4.91071	3	4	1.78571	34	60.7143	2
1026	2	0	1	1	1	0	0	3	3	0	0	0	#NULL!	3	200	0	1.58	3.24	2.34	4.7	49	2	4	4	5	3	1	3	3	98	3	3	1	1	1	36	20	10	12	15	30	5	2.5	2	4	2	36	72	2
1062	1	1	1	1	1	0	0	3	3	#NULL!	4	2	4	2	208	0	1.73077	3.32692	2.61538	1.82692	21	3	4	5	2	2	3	3	2	40.3846	2	2	0	1	1	10	7	3.36538	0	17	32.6923	12	5.76923	3	4	1.92308	35	67.3077	2
1068	2	0	1	1	1	1	0	3	4	0	0	0	#NULL!	0	224	0	1.10714	3.08929	3.125	1.39286	10	1	4	5	2	1	3	3	2	17.8571	1	2	0	0	1	3	2	0.892857	0	17	30.3571	11	4.91071	3	1	0.446429	50	89.2857	3
1095	2	0	1	1	1	1	1	3	5	0	0	0	#NULL!	0	224	0	1.58929	2.625	2.83929	1.10714	10	2	3	5	1	1	5	3	1	17.8571	1	2	0	0	1	1	1	0.446429	0	8	14.2857	2	0.892857	1	0	0	48	85.7143	3
1125	1	1	1	1	1	1	0	3	4	#NULL!	4	2	3	16	96	0	2.20833	2.91667	1.08333	2.70833	11	4	4	1	3	5	4	3	1	45.8333	2	3	1	1	1	9	7	7.29167	7	9	37.5	5	5.20833	3	0	0	1	4.16667	0
1130	3	0	1	1	1	1	1	3	5	0	0	0	#NULL!	7	168	0	1.28571	1.66667	1.69048	2	17	1	1	2	2	4	1	2	4	40.4762	2	2	0	1	1	5	3	1.78571	2	0	0	0	0	1	0	0	18	42.8571	1
1134	3	0	1	1	1	1	1	3	5	1	1	1	#NULL!	0	224	0	1.35714	2.44643	1.89286	0.482143	4	2	2	2	1	1	4	3	1	7.14286	1	2	0	0	1	0	0	0	0	6	10.7143	2	0.892857	1	0	0	27	48.2143	1
1135	1	1	1	0	0	0	0	1	1	#NULL!	4	2	4	0	224	0	2.53571	3.28571	2.82143	2.73214	31	5	4	5	3	1	3	2	4	55.3571	2	3	1	1	1	16	12	5.35714	4	20	35.7143	10	4.46429	3	1	0.446429	50	89.2857	3
1141	3	0	1	1	0	1	1	2	4	0	0	0	#NULL!	11	136	0	2.29412	2.79412	2.52941	4.47059	30	5	3	4	5	4	1	1	3	88.2353	3	2	0	1	1	28	15	11.0294	4	1	2.94118	0	0	1	0	0	26	76.4706	3
1142	3	0	1	1	1	1	0	3	4	0	0	0	#NULL!	0	224	0	1.66071	3.10714	2.67857	2.14286	24	3	4	5	3	1	1	1	1	42.8571	2	3	1	1	1	15	9	4.01786	3	14	25	6	2.67857	2	3	1.33929	40	71.4286	2
1148	2	0	1	1	1	1	1	3	5	0	0	0	#NULL!	23	40	0	1.6	2.6	2	3	7	2	3	3	3	5	1	4	4	70	3	2	0	1	1	2	1	2.5	1	2	20	1	2.5	2	0	0	5	50	2
1156	2	0	0	1	1	1	1	2	4	1	1	1	#NULL!	2	208	0	2.21154	2.84615	2.51923	3.32692	35	4	4	4	4	2	3	1	3	67.3077	3	3	1	1	1	23	16	7.69231	7	8	15.3846	3	1.44231	2	2	0.961538	40	76.9231	3
1158	3	0	0	1	0	0	1	1	2	0	0	0	#NULL!	0	224	0	0.589286	1.48214	0.375	0.0535714	0	1	1	1	1	1	3	2	2	0	1	1	0	0	0	0	0	0	0	0	0	0	0	1	0	0	4	7.14286	0
1193	1	1	1	1	0	0	0	2	2	#NULL!	4	2	4	2	208	0	1.61538	2.65385	2.34615	1.38462	16	2	3	4	2	2	4	3	1	30.7692	1	2	0	0	1	7	1	0.480769	0	5	9.61538	2	0.961538	1	0	0	37	71.1538	2
1198	1	1	1	1	0	1	1	2	4	#NULL!	4	2	3	5	184	0	1.65217	2.69565	1.63043	3.78261	35	2	3	2	4	3	4	2	2	76.087	3	3	1	1	1	27	13	7.06522	7	8	17.3913	5	2.71739	2	2	1.08696	15	32.6087	1
1212	2	0	1	1	1	1	1	3	5	0	0	0	#NULL!	11	136	0	1.67647	2.20588	1.64706	2.11765	17	3	2	2	3	4	4	3	3	50	2	2	0	1	1	9	6	4.41176	0	1	2.94118	0	0	1	0	0	13	38.2353	1
1219	2	0	1	1	1	1	1	3	5	0	0	0	#NULL!	2	208	0	2.23077	2.80769	2.86538	4.32692	44	4	3	5	5	2	4	3	3	84.6154	3	3	1	1	1	35	23	11.0577	10	11	21.1538	3	1.44231	2	1	0.480769	46	88.4615	3
1220	3	0	1	1	0	1	0	2	3	0	0	0	#NULL!	0	224	0	0.946429	2.48214	1.69643	0.571429	1	1	2	2	1	1	1	2	1	1.78571	1	2	0	0	1	1	0	0	0	11	19.6429	2	0.892857	1	0	0	20	35.7143	1
1224	2	0	1	1	1	1	1	3	5	0	0	0	#NULL!	0	224	0	1.53571	3	2.5	1.33929	12	2	4	4	2	1	1	3	2	21.4286	1	2	0	0	1	8	1	0.446429	1	14	25	4	1.78571	2	0	0	39	69.6429	2
1226	1	1	1	1	1	1	1	3	5	#NULL!	4	2	1	5	184	0	1.5	1.97826	1.69565	1.56522	16	2	1	2	2	3	1	4	2	34.7826	2	2	0	1	1	6	2	1.08696	0	2	4.34783	0	0	1	0	0	18	39.1304	1
1240	1	1	1	0	1	1	1	2	4	#NULL!	4	2	2	0	224	0	2.94643	3.80357	3.67857	3.78571	47	5	5	5	4	1	4	4	3	83.9286	3	3	1	1	1	31	16	7.14286	8	30	53.5714	14	6.25	3	3	1.33929	56	100	3
1242	1	1	1	1	1	1	1	3	5	#NULL!	4	2	1	1	216	0	1.72222	2	1.46296	0.907407	12	3	1	1	1	2	1	4	4	22.2222	1	1	0	0	0	1	0	0	0	0	0	0	0	1	0	0	20	37.037	1
1250	3	0	0	1	1	1	0	2	3	0	0	0	#NULL!	21	56	0	2.57143	3.21429	2	4.07143	10	5	4	3	4	5	3	2	4	71.4286	3	3	1	1	1	8	7	12.5	3	4	28.5714	3	5.35714	3	1	1.78571	7	50	2
1256	1	1	1	1	1	1	1	3	5	#NULL!	4	2	3	2	208	0	1.71154	3.19231	2.05769	3.30769	26	3	4	3	4	2	4	1	3	50	2	3	1	1	1	22	20	9.61538	16	19	36.5385	13	6.25	3	8	3.84615	28	53.8462	2
1261	3	0	0	1	1	1	1	2	4	0	0	0	#NULL!	0	224	0	1.17857	2.25	1.91071	0.910714	11	1	2	2	1	1	1	2	2	19.6429	1	2	0	0	1	3	0	0	0	4	7.14286	0	0	1	0	0	32	57.1429	2
1271	2	0	1	1	1	1	1	3	5	0	0	0	#NULL!	5	184	0	1.80435	2	1.76087	2.54348	24	3	1	2	3	3	1	3	3	52.1739	2	3	1	1	1	14	7	3.80435	2	3	6.52174	1	0.543478	1	0	0	19	41.3043	1
1275	1	1	0	1	1	1	1	2	4	#NULL!	4	2	1	22	48	0	2.75	4.66667	2.08333	4.75	10	5	5	3	5	5	1	3	3	83.3333	3	3	1	1	1	9	6	12.5	6	9	75	8	16.6667	4	4	8.33333	6	50	2
1282	1	1	1	1	1	1	0	3	4	#NULL!	2	1	1	1	216	0	2.18519	3.22222	3.42593	2.01852	18	4	4	5	2	2	4	3	3	33.3333	1	3	1	0	1	9	4	1.85185	2	16	29.6296	7	3.24074	2	2	0.925926	50	92.5926	3
1286	1	1	1	1	1	1	0	3	4	#NULL!	2	1	3	2	208	0	1.55769	2.5	2.19231	2.09615	20	2	2	3	3	2	4	2	4	38.4615	2	3	1	1	1	9	6	2.88462	3	7	13.4615	4	1.92308	2	1	0.480769	29	55.7692	2
1294	3	0	1	1	0	0	1	2	3	1	1	1	#NULL!	0	224	0	2.30357	3.19643	3	3.08929	37	5	4	5	3	1	1	2	2	66.0714	2	3	1	1	1	29	12	5.35714	3	16	28.5714	2	0.892857	1	0	0	49	87.5	3
1295	1	1	1	1	0	1	0	2	3	#NULL!	4	2	3	2	208	0	1.48077	2.57692	2.07692	1.13462	7	2	3	3	1	2	1	3	4	13.4615	1	2	0	0	1	3	3	1.44231	0	10	19.2308	4	1.92308	2	1	0.480769	28	53.8462	2
1310	1	1	0	1	1	1	1	2	4	#NULL!	4	2	4	0	224	0	1.66071	1.96429	1.66071	1.5	15	3	1	2	2	1	1	2	3	26.7857	1	2	0	0	1	2	0	0	0	0	0	0	0	1	0	0	21	37.5	1
1312	1	1	0	1	1	1	1	2	4	#NULL!	4	2	4	2	208	0	1.30769	2.55769	1.32692	3.26923	32	1	3	1	4	2	4	4	1	61.5385	2	3	1	1	1	19	16	7.69231	13	7	13.4615	3	1.44231	2	2	0.961538	12	23.0769	0
1343	3	0	0	1	1	1	1	2	4	0	0	0	#NULL!	0	224	0	1.60714	2.78571	1.58929	2.17857	25	2	3	1	3	1	1	1	3	44.6429	2	3	1	1	1	8	3	1.33929	2	12	21.4286	5	2.23214	2	2	0.892857	16	28.5714	1
1351	1	1	0	1	0	1	0	1	2	#NULL!	4	2	3	0	224	0	1.14286	1.98214	1.55357	1.82143	20	1	1	1	2	1	4	4	3	35.7143	2	2	0	1	1	6	3	1.33929	0	3	5.35714	1	0.446429	1	0	0	19	33.9286	1
1371	3	0	1	1	0	0	1	2	3	1	1	1	#NULL!	11	136	0	2.05882	4.11765	3.05882	3.70588	24	4	5	5	4	4	3	2	3	70.5882	3	3	1	1	1	15	12	8.82353	7	25	73.5294	12	8.82353	3	5	3.67647	30	88.2353	3
1373	1	1	1	1	1	1	1	3	5	#NULL!	3	2	2	6	176	0	2.09091	3.15909	2.75	4.15909	34	4	4	5	4	3	1	4	3	77.2727	3	3	1	1	1	26	20	11.3636	14	13	29.5455	7	3.97727	2	0	0	35	79.5455	3
1374	1	1	1	1	0	1	0	2	3	#NULL!	4	2	4	9	152	0	1.55263	3.15789	1.21053	4.89474	30	2	4	1	5	4	3	4	4	78.9474	3	3	1	1	1	20	18	11.8421	16	11	28.9474	8	5.26316	3	6	3.94737	4	10.5263	0
1385	2	0	1	1	1	1	1	3	5	0	0	0	#NULL!	2	208	0	1.63462	2.73077	2.38462	2.51923	27	2	3	4	3	2	3	1	2	51.9231	2	3	1	1	1	15	3	1.44231	2	6	11.5385	2	0.961538	1	1	0.480769	38	73.0769	2
1406	1	1	0	1	0	1	1	1	3	#NULL!	4	2	4	14	112	0	1.78571	2.60714	1.71429	3.21429	22	3	3	2	4	4	4	4	3	78.5714	3	3	1	1	1	11	5	4.46429	2	3	10.7143	1	0.892857	1	0	0	12	42.8571	1
1410	1	1	1	1	1	1	0	3	4	#NULL!	3	2	4	2	208	0	1.65385	2.5	1.88462	2.13462	21	2	2	2	3	2	5	4	2	40.3846	2	3	1	1	1	15	7	3.36538	2	7	13.4615	3	1.44231	2	2	0.961538	21	40.3846	1
1413	1	1	1	1	1	1	1	3	5	#NULL!	4	2	2	17	88	0	2	2.31818	1.81818	2.54545	15	4	2	2	3	5	4	4	4	68.1818	3	2	0	1	1	7	1	1.13636	0	0	0	0	0	1	0	0	10	45.4545	1
1422	3	0	1	1	1	1	0	3	4	0	0	0	#NULL!	21	56	0	2	2.64286	1.85714	6.5	14	4	3	2	5	5	2	3	4	100	3	2	0	1	1	14	12	21.4286	7	3	21.4286	0	0	1	0	0	6	42.8571	1
1437	1	1	1	1	1	1	1	3	5	#NULL!	4	2	2	4	192	0	1.83333	2.27083	2.1875	1.47917	13	3	2	3	2	3	1	3	3	27.0833	1	1	0	0	0	1	0	0	0	4	8.33333	1	0.520833	1	0	0	26	54.1667	2
1461	2	0	1	1	1	1	0	3	4	0	0	0	#NULL!	0	224	0	2.03571	3.71429	3.07143	2.60714	22	4	5	5	3	1	3	4	2	39.2857	2	3	1	1	1	15	12	5.35714	5	27	48.2143	18	8.03571	3	2	0.892857	47	83.9286	3
1500	2	0	0	1	1	1	1	2	4	1	1	1	#NULL!	3	200	0	1.72	2.98	1.58	1.24	9	3	4	1	1	3	3	3	1	18	1	3	1	0	1	4	2	1	2	8	16	4	2	2	1	0.5	18	36	1
1505	3	0	1	0	0	0	0	1	1	1	1	1	#NULL!	6	176	0	2.38636	3.70455	3.04545	6.47727	43	5	5	5	5	3	1	1	3	97.7273	3	3	1	1	1	42	37	21.0227	29	24	54.5455	12	6.81818	3	0	0	36	81.8182	3
1512	2	0	1	1	0	0	0	2	2	0	0	0	#NULL!	1	216	0	1.68519	2.24074	1.72222	0.314815	3	3	2	2	1	2	4	3	2	5.55556	1	1	0	0	0	0	0	0	0	1	1.85185	0	0	1	0	0	20	37.037	1
1520	2	0	1	1	1	1	1	3	5	1	1	1	#NULL!	5	184	0	1.36957	2.78261	2.17391	2.06522	21	2	3	3	2	3	1	1	3	45.6522	2	2	0	1	1	10	2	1.08696	1	10	21.7391	7	3.80435	2	1	0.543478	29	63.0435	2
1524	1	1	0	1	0	0	1	1	2	#NULL!	4	2	4	0	224	0	1.46429	2.80357	2.16071	4.07143	47	2	3	3	4	1	1	1	2	83.9286	3	3	1	1	1	36	22	9.82143	9	7	12.5	1	0.446429	1	0	0	33	58.9286	2
1528	1	1	1	1	1	1	1	3	5	#NULL!	4	2	4	5	184	0	1.69565	2.45652	1.65217	3.28261	31	3	2	2	4	3	1	1	3	67.3913	3	3	1	1	1	18	12	6.52174	5	2	4.34783	1	0.543478	1	0	0	18	39.1304	1
1530	1	1	0	1	1	0	1	2	3	#NULL!	4	2	4	6	176	0	1.45455	2.06818	1.47727	1.90909	16	2	1	1	2	3	5	4	3	36.3636	2	2	0	1	1	6	5	2.84091	1	4	9.09091	0	0	1	0	0	13	29.5455	1
1531	3	0	1	1	1	1	1	3	5	1	1	1	#NULL!	4	192	0	1.77083	2.95833	2.60417	1.9375	17	3	4	5	2	3	5	3	2	35.4167	2	3	1	1	1	9	6	3.125	3	14	29.1667	4	2.08333	2	1	0.520833	38	79.1667	3
1533	2	0	0	1	1	1	0	2	3	0	0	0	#NULL!	0	224	0	1.01786	2.92857	2.07143	0.732143	3	1	4	3	1	1	3	4	2	5.35714	1	1	0	0	0	0	0	0	0	11	19.6429	1	0.446429	1	0	0	29	51.7857	2
1558	3	0	0	1	1	1	1	2	4	0	0	0	#NULL!	0	224	0	1.17857	2.125	1.48214	0.321429	0	1	1	1	1	1	1	1	1	0	1	2	0	0	1	0	0	0	0	5	8.92857	3	1.33929	2	0	0	15	26.7857	1
1581	1	1	1	1	1	1	1	3	5	#NULL!	4	2	2	2	208	0	2.28846	2.86538	2.84615	3.26923	40	5	4	5	4	2	3	2	2	76.9231	3	2	0	1	1	30	12	5.76923	1	8	15.3846	1	0.480769	1	0	0	44	84.6154	3
1583	1	1	1	1	0	1	0	2	3	#NULL!	4	2	4	0	224	0	1.26786	4.03571	2.60714	2.51786	24	1	5	5	3	1	4	4	2	42.8571	2	2	0	1	1	15	11	4.91071	1	36	64.2857	19	8.48214	3	7	3.125	41	73.2143	2
1599	1	1	0	1	1	1	1	2	4	#NULL!	4	2	3	0	224	0	2.01786	2.60714	2.21429	0.678571	4	4	3	4	1	1	4	2	2	7.14286	1	1	0	0	0	1	1	0.446429	0	5	8.92857	0	0	1	0	0	34	60.7143	2
1600	1	1	0	1	1	1	0	2	3	#NULL!	4	2	4	0	224	0	0.839286	2.30357	1.41071	0.0535714	0	1	2	1	1	1	5	2	2	0	1	1	0	0	0	0	0	0	0	3	5.35714	1	0.446429	1	0	0	16	28.5714	1
1611	3	0	1	1	1	1	1	3	5	0	0	0	#NULL!	7	168	0	2.09524	2.61905	2.54762	2.04762	17	4	3	4	2	4	3	2	3	40.4762	2	2	0	1	1	10	3	1.78571	0	3	7.14286	0	0	1	0	0	34	80.9524	3
1615	1	1	0	1	1	1	0	2	3	#NULL!	3	2	4	14	112	0	2.25	2.75	1.78571	5.28571	27	4	3	2	5	4	4	4	4	96.4286	3	3	1	1	1	24	17	15.1786	13	6	21.4286	3	2.67857	2	0	0	14	50	2
1625	2	0	1	1	1	1	1	3	5	1	1	1	#NULL!	1	216	0	1.68519	2.90741	2.48148	1.66667	15	3	4	4	2	2	5	4	4	27.7778	1	2	0	0	1	8	4	1.85185	0	11	20.3704	7	3.24074	2	3	1.38889	38	70.3704	2
1627	1	1	1	1	1	1	1	3	5	#NULL!	3	2	3	3	200	0	1.54	1.96	1.24	2.14	24	2	1	1	3	3	3	1	2	48	2	2	0	1	1	10	1	0.5	0	0	0	0	0	1	0	0	10	20	0
1632	1	1	1	1	1	1	0	3	4	#NULL!	4	2	2	0	224	0	1.14286	2.32143	1.64286	0.410714	6	1	2	2	1	1	3	2	1	10.7143	1	1	0	0	0	0	0	0	0	3	5.35714	0	0	1	0	0	21	37.5	1
1640	1	1	0	1	0	1	1	1	3	#NULL!	3	2	3	7	168	0	2.45238	3.59524	2.83333	6.90476	42	5	5	5	5	4	4	2	3	100	3	3	1	1	1	41	39	23.2143	33	20	47.619	11	6.54762	3	2	1.19048	35	83.3333	3
1648	1	1	1	1	1	1	1	3	5	#NULL!	4	2	4	1	216	0	1.2037	2.72222	2.03704	1.51852	15	1	3	3	2	2	3	2	2	27.7778	1	2	0	0	1	6	2	0.925926	0	17	31.4815	7	3.24074	2	1	0.462963	25	46.2963	1
1651	1	1	0	1	1	1	1	2	4	#NULL!	4	2	1	3	200	0	1.62	2.68	2.04	3	27	2	3	3	3	3	4	3	4	54	2	3	1	1	1	15	9	4.5	6	11	22	6	3	2	3	1.5	25	50	2
1656	3	0	1	1	0	1	0	2	3	0	0	0	#NULL!	3	200	0	1.26	3.68	2.3	2.74	25	1	5	4	3	3	3	2	2	50	2	3	1	1	1	17	10	5	6	26	52	19	9.5	3	5	2.5	30	60	2
1675	2	0	0	1	1	1	1	2	4	0	0	0	#NULL!	7	168	0	1.21429	2.02381	1.64286	0.47619	3	1	1	2	1	4	1	1	2	7.14286	1	1	0	0	0	1	0	0	0	0	0	0	0	1	0	0	15	35.7143	1
1693	2	0	1	1	1	1	0	3	4	0	0	0	#NULL!	6	176	0	1.79545	3.54545	2.04545	3.15909	25	3	5	3	4	3	4	1	3	56.8182	2	3	1	1	1	16	12	6.81818	6	21	47.7273	10	5.68182	3	4	2.27273	25	56.8182	2
1711	1	1	0	1	0	0	1	1	2	#NULL!	4	2	3	0	224	0	1.91071	2.64286	1.25	1.96429	20	3	3	1	2	1	4	3	1	35.7143	2	2	0	1	1	10	7	3.125	0	3	5.35714	2	0.892857	1	0	0	10	17.8571	0
1714	2	0	0	1	1	1	0	2	3	0	0	0	#NULL!	1	216	0	1.35185	3.07407	2.64815	2.05556	17	2	4	5	2	2	5	3	2	31.4815	1	2	0	0	1	13	4	1.85185	0	13	24.0741	6	2.77778	2	0	0	42	77.7778	3
1729	2	0	1	1	1	1	1	3	5	0	0	0	#NULL!	2	208	0	1.71154	2.92308	2.67308	1.05769	8	3	4	5	1	2	4	1	2	15.3846	1	2	0	0	1	4	0	0	0	12	23.0769	2	0.961538	1	0	0	44	84.6154	3
1731	1	1	1	1	1	1	0	3	4	#NULL!	3	2	3	15	104	0	2.30769	2.76923	2.07692	3.46154	15	5	3	3	4	4	5	4	4	57.6923	2	3	1	1	1	13	8	7.69231	4	6	23.0769	2	1.92308	2	0	0	14	53.8462	2
1751	1	1	0	1	0	1	0	1	2	#NULL!	2	1	1	26	16	0	2	2.75	1.75	4.5	4	4	3	2	5	5	1	3	3	100	3	2	0	1	1	4	2	12.5	0	0	0	0	0	1	0	0	2	50	2
1812	3	0	1	1	1	1	1	3	5	0	0	0	#NULL!	8	160	0	1.4	2.65	2.075	3.95	30	2	3	3	4	4	3	4	4	75	3	3	1	1	1	18	12	7.5	7	6	15	4	2.5	2	2	1.25	20	50	2
1813	1	1	0	1	1	1	1	2	4	#NULL!	4	2	4	2	208	0	1.40385	2.34615	1.51923	1.75	18	2	2	1	2	2	4	4	3	34.6154	2	2	0	1	1	5	2	0.961538	0	5	9.61538	1	0.480769	1	0	0	14	26.9231	1
1820	1	1	1	1	1	1	1	3	5	#NULL!	2	1	3	0	224	0	2	3.28571	2.875	2.30357	27	4	4	5	3	1	4	3	2	48.2143	2	3	1	1	1	17	5	2.23214	2	20	35.7143	16	7.14286	3	5	2.23214	42	75	3
1828	2	0	0	1	1	1	1	2	4	0	0	0	#NULL!	2	208	0	1.28846	2.53846	2.51923	0.25	0	1	3	4	1	2	5	2	2	0	1	2	0	0	1	0	0	0	0	5	9.61538	2	0.961538	1	0	0	40	76.9231	3
1843	1	1	1	1	1	1	1	3	5	#NULL!	4	2	4	6	176	0	2.22727	3.22727	2.75	3.06818	25	4	4	5	3	3	4	2	3	56.8182	2	3	1	1	1	16	13	7.38636	6	17	38.6364	7	3.97727	2	2	1.13636	32	72.7273	2
1860	1	1	1	1	1	1	1	3	5	#NULL!	4	2	1	1	216	0	1.55556	2.68519	2.81481	2.40741	26	2	3	5	3	2	3	4	3	48.1481	2	2	0	1	1	17	8	3.7037	1	11	20.3704	5	2.31481	2	0	0	42	77.7778	3
1864	1	1	1	1	1	1	1	3	5	#NULL!	3	2	1	2	208	0	1.94231	2.53846	2.21154	1.73077	19	4	3	4	2	2	4	2	3	36.5385	2	2	0	1	1	6	3	1.44231	1	4	7.69231	1	0.480769	1	0	0	33	63.4615	2
1879	1	1	1	1	1	1	1	3	5	#NULL!	4	2	4	3	200	0	1.86	3.68	2.38	3.66	35	3	5	4	4	3	3	2	3	70	3	3	1	1	1	26	20	10	10	26	52	13	6.5	3	6	3	33	66	2
1890	1	1	1	1	1	1	0	3	4	#NULL!	2	1	1	2	208	0	1.69231	2.19231	2.17308	1.55769	16	3	2	3	2	2	2	2	4	30.7692	1	2	0	0	1	8	4	1.92308	0	4	7.69231	1	0.480769	1	0	0	32	61.5385	2
1905	1	1	1	1	1	1	1	3	5	#NULL!	4	2	1	4	192	0	2.20833	3.47917	3.04167	4.52083	38	4	5	5	5	3	4	3	3	79.1667	3	3	1	1	1	35	31	16.1458	16	20	41.6667	9	4.6875	3	3	1.5625	39	81.25	3
1906	2	0	1	1	1	1	1	3	5	0	0	0	#NULL!	0	224	0	1.01786	3.10714	2.57143	1	7	1	4	4	1	1	1	2	2	12.5	1	2	0	0	1	3	1	0.446429	0	18	32.1429	9	4.01786	3	2	0.892857	39	69.6429	2
1912	2	0	1	1	1	0	1	3	4	0	0	0	#NULL!	3	200	0	2.5	2.68	3.12	3.08	34	5	3	5	3	3	4	3	2	68	3	2	0	1	1	15	9	4.5	2	8	16	0	0	1	0	0	43	86	3
1930	1	1	1	1	1	1	1	3	5	#NULL!	4	2	4	11	136	0	2.08824	3.44118	2.76471	5.64706	34	4	5	5	5	4	4	3	3	100	3	3	1	1	1	26	21	15.4412	11	13	38.2353	6	4.41176	3	1	0.735294	27	79.4118	3
1948	2	0	0	0	0	0	0	0	0	0	0	0	#NULL!	3	200	0	0.8	2	1.14	1.24	11	1	1	1	1	3	4	2	2	22	1	2	0	0	1	4	2	1	0	1	2	0	0	1	0	0	4	8	0
1961	3	0	1	1	1	1	0	3	4	0	0	0	#NULL!	11	136	0	1.52941	1.67647	1.91176	1.97059	19	2	1	2	2	4	1	2	3	55.8824	2	2	0	1	1	2	0	0	0	2	5.88235	0	0	1	0	0	17	50	2
1966	1	1	1	1	1	1	1	3	5	#NULL!	2	1	#NULL!	1	216	0	1.53704	3.31481	2.66667	1.96296	16	2	4	5	2	2	4	3	2	29.6296	1	3	1	0	1	7	5	2.31481	2	15	27.7778	7	3.24074	2	2	0.925926	42	77.7778	3
1977	2	0	0	1	1	1	0	2	3	0	0	0	#NULL!	0	224	0	0.964286	2.125	1.73214	0.464286	4	1	1	2	1	1	4	3	1	7.14286	1	1	0	0	0	0	0	0	0	2	3.57143	1	0.446429	1	0	0	20	35.7143	1
1981	1	1	0	0	0	0	0	0	0	#NULL!	3	2	1	26	16	0	2.75	3.25	2	5.5	4	5	4	3	5	5	4	4	3	100	3	2	0	1	1	4	4	25	2	1	25	0	0	1	0	0	2	50	2
1990	2	0	0	0	1	1	0	1	2	0	0	0	#NULL!	10	144	0	2.41667	3.69444	1.52778	6.97222	34	5	5	1	5	4	3	1	3	94.4444	3	3	1	1	1	28	28	19.4444	26	21	58.3333	8	5.55556	3	3	2.08333	12	33.3333	1
2040	2	0	1	1	1	1	1	3	5	0	0	0	#NULL!	11	136	0	1.35294	3.29412	2.47059	3.11765	20	2	4	4	4	4	5	4	4	58.8235	2	3	1	1	1	14	10	7.35294	4	13	38.2353	7	5.14706	3	2	1.47059	23	67.6471	2
2052	2	0	1	1	1	1	0	3	4	0	0	0	#NULL!	6	176	0	1.31818	2.90909	2.02273	2.81818	25	1	4	3	3	3	3	3	2	56.8182	2	3	1	1	1	15	8	4.54545	3	10	22.7273	4	2.27273	2	2	1.13636	24	54.5455	2
2080	1	1	1	1	1	1	1	3	5	#NULL!	3	2	3	0	224	0	1.78571	2.28571	1.92857	2.21429	27	3	2	2	3	1	4	2	2	48.2143	2	2	0	1	1	8	2	0.892857	0	2	3.57143	0	0	1	0	0	30	53.5714	2
2093	1	1	0	1	1	0	1	2	3	#NULL!	4	2	4	7	168	0	1.14286	1.85714	1.57143	1.92857	16	1	1	1	2	4	4	3	4	38.0952	2	2	0	1	1	5	2	1.19048	1	0	0	0	0	1	0	0	13	30.9524	1
2097	1	1	1	1	1	1	0	3	4	#NULL!	2	1	#NULL!	0	224	0	1.94643	2.92857	2.69643	2.48214	26	4	4	5	3	1	1	4	3	46.4286	2	3	1	1	1	17	10	4.46429	8	12	21.4286	7	3.125	2	3	1.33929	43	76.7857	3
2138	2	0	1	1	1	1	1	3	5	0	0	0	#NULL!	1	216	0	2.25926	2.81481	2.7963	2.57407	24	4	3	5	3	2	4	3	2	44.4444	2	3	1	1	1	15	9	4.16667	5	12	22.2222	3	1.38889	2	0	0	43	79.6296	3
2147	1	1	0	0	1	1	1	1	3	#NULL!	4	2	3	18	80	0	2.4	2.65	1.55	4.9	19	5	3	1	5	5	3	3	3	95	3	2	0	1	1	15	13	16.25	7	3	15	0	0	1	0	0	8	40	1
2158	1	1	1	1	1	1	0	3	4	#NULL!	4	2	2	6	176	0	2.25	2.59091	2.29545	2.31818	21	4	3	4	3	3	3	1	2	47.7273	2	2	0	1	1	10	3	1.70455	1	5	11.3636	1	0.568182	1	0	0	27	61.3636	2
2171	3	0	0	1	0	1	0	1	2	0	0	0	#NULL!	3	200	0	1.78	2.72	2.4	0.58	4	3	3	4	1	3	3	2	2	8	1	2	0	0	1	1	0	0	0	6	12	4	2	2	1	0.5	35	70	2
2207	1	1	0	1	1	1	0	2	3	#NULL!	4	2	4	5	184	0	1.1087	2.65217	1.56522	2.63043	26	1	3	1	3	3	3	4	4	56.5217	2	3	1	1	1	12	7	3.80435	5	8	17.3913	5	2.71739	2	2	1.08696	13	28.2609	1
2218	1	1	0	1	0	1	0	1	2	#NULL!	4	2	2	5	184	0	1.69565	2.43478	1.97826	1.73913	19	3	2	3	2	3	5	2	2	41.3043	2	2	0	1	1	10	4	2.17391	1	7	15.2174	3	1.63043	2	0	0	21	45.6522	1
2221	1	1	1	0	1	1	1	2	4	#NULL!	4	2	3	12	128	0	2.5625	3.625	2.90625	4.375	25	5	5	5	5	4	3	4	2	78.125	3	3	1	1	1	24	18	14.0625	11	16	50	6	4.6875	3	1	0.78125	28	87.5	3
2251	2	0	0	1	1	1	1	2	4	0	0	0	#NULL!	27	8	0	3	2	1	1	0	5	1	1	1	5	1	3	4	0	1	1	0	0	0	0	0	0	0	0	0	0	0	1	0	0	0	0	0
2263	1	1	0	1	1	1	1	2	4	#NULL!	4	2	3	5	184	0	1	3.23913	1.93478	2.32609	21	1	4	3	3	3	1	3	4	45.6522	2	2	0	1	1	8	2	1.08696	0	16	34.7826	10	5.43478	3	2	1.08696	24	52.1739	2
2280	1	1	0	1	1	1	1	2	4	#NULL!	4	2	1	13	120	0	1.66667	2.26667	1.36667	3.63333	28	3	2	1	4	4	3	3	3	93.3333	3	3	1	1	1	15	5	4.16667	3	3	10	2	1.66667	2	0	0	5	16.6667	0
2338	1	1	0	1	1	1	1	2	4	#NULL!	4	2	4	2	208	0	1.84615	2.42308	1.88462	1.82692	16	3	2	2	2	2	1	2	3	30.7692	1	2	0	0	1	9	3	1.44231	0	3	5.76923	1	0.480769	1	0	0	26	50	2
[truncated: 89 more columns]
